# Supplementary material
Source: publisher figshare collection journal article supplement (https://gsapubs.figshare.com/ndownloader/files/22276938)
Supplement: Supplementary file 1 [file 22276938]

## Sheet: Sheet1
Spot Num.	Type	Location	Li7 (ppm)	Precision (±ppm)	K39 (ppm)	Precision (±ppm)	Rb85 (ppm)	Precision (±ppm)	Sr88 (ppm)	Precision (±ppm)	Ba137 (ppm)	Precision (±ppm)	Pb208 (ppm)	Precision (±ppm)	Th232 (ppm)	Precision (±ppm)	U238 (ppm)	Precision (±ppm)
S-02_olivine1_01	Olivine in lherzolite xenolith	Rim	12.1276	0.6408	284.331	22.5167	4.4874	0.3725	3.1192	0.365	4.0342	0.9063	5.3808	0.3357	2.7044	0.3343	0.0924	0.0313
S-02_olivine1_02	Olivine in lherzolite xenolith	Core	11.6466	0.1172	40.8664	1.6838	0.8159	0.0532	1.277	0.072	3.0649	0.0181	1.0738	0.0095	0.5409	0.0012	<0.0010	0.0002
S-02_olivine1_03	Olivine in lherzolite xenolith	Rim	12.7205	0.3764	205.544	53.7311	2.8974	0.5703	4.8133	0.7071	7.4351	1.5132	2.0303	0.1511	1.9804	0.1902	0.1178	0.0197
S-02_olivine2_03	Olivine in lherzolite xenolith	Rim	6.1634	0.138	34.8387	3.9955	0.4627	0.0599	1.3141	0.089	1.0953	0.1462	0.5487	0.0625	0.7191	0.0599	0.0274	0.0044
SLP15-05-1-1_1	Olivine phenocryst in trachyandesite	Rim	8.32355	0.1456	1.498	3.5964	0.015	0.059	0.014	0.2738	0.014	0.2607	0.021	0.0957	0.003	0.1429	0.002	0.0093
SLP15-05-1-1_2	Olivine phenocryst in trachyandesite	Rim	7.90148	0.25226	<1.57640	0.25078	<0.06248	0.03144	0.02772	0.00753	0.0203	0.01812	<0.01152	0.00996	0.00376	0.00266	<0.00448	0.00144
SLP15-05-1-1_3	Olivine phenocryst in trachyandesite	Rim	8.06544	0.206	3.57031	0.9894	0.152809	0.0293	0.127311	0.0367	0.380645	0.0298	0.116757	0.0392	0.00685946	0.0044	0.002	0.0008
SLP15-05-1-1_4	Olivine phenocryst in trachyandesite	Rim	7.82809	0.21955	<1.57529	0.5616	<0.07458	0.01753	0.0098	0.0046	<0.01740	0.00971	<0.00918	0.00525	<0.00223	0.00214	<0.00476	0.00156
SLP15-05-1-2_1	Olivine phenocryst in trachyandesite	Core	8.01759	0.22232	<1.27335	3.48601	<0.06936	0.02435	0.01111	0.00519	<0.01463	0.01419	0.01368	0.00632	<0.00254	0.00212	<0.00276	0.0008
SLP15-05-1-2_2	Olivine phenocryst in trachyandesite	Core	10.0198	0.1929	3.8773	0.8966	0.1195	0.0225	0.1678	0.035	0.237	0.0523	0.3157	0.0537	0.0853	0.0252	0.0018	0.001
SLP15-05-1-2_3	Olivine phenocryst in trachyandesite	Core	9.2855	0.146	9.2818	1.2917	0.159	0.0265	0.4846	0.0817	0.4285	0.0846	0.2877	0.0327	0.2523	0.0304	0.0088	0.002
SLP15-02-6_1	Olivine phenocryst in trachyandesite	Core	9.0444	0.1838	10.2205	1.1929	0.1712	0.0256	0.3484	0.0537	0.3318	0.0559	0.2765	0.0397	0.2693	0.0502	0.0094	0.0025
SLP15-02-6_2	Olivine phenocryst in trachyandesite	Core	8.5371	0.1561	<1.1203	0.3415	<0.0220	0.0097	0.0692	0.0103	0.0686	0.0221	0.0553	0.0129	0.0119	0.0027	0.0005	0.0005
SLP15-02-6_3	Olivine phenocryst in trachyandesite	Core	8.912	0.136	<1.1085	0.1642	0.0288	0.0117	0.084	0.0117	0.0728	0.026	0.0891	0.0137	0.0031	0.0015	<0.0002	0.0008
